# Supplementary material for: Development and preliminary testing of Health Equity Across the AI Lifecycle (HEAAL): A framework for healthcare delivery organizations to mitigate the risk of AI solutions worsening health inequities
Source: PubMed Central journal article supplement (PMC11081364; doi:10.1371/journal.pdig.0000390), 2024-05-09
Supplement: pdig.0000390.s001.pdf [file pdig.0000390.s001.pdf]

**S1 Appendix. Overview of Health Equity Across the AI Lifecycle (HEAAL).** For evaluating an existing AI solution, follow procedures written in red and black text. For evaluating a new AI solution, follow procedures written in blue and black text.

| Adoption stage                         | Decision point                              | Assessment domains                 | Procedures                                                                                                                                                                                                                                                                                                                                                                                                                                                                                                                                                                                                                                                                                                                                                                                                                                                                                                                                                                                                                                                                                                                                                                                                                                                                                                                                                                                                                                                                                                                                                                                                                                                                                                                                                                                                                                                                               |
|----------------------------------------|---------------------------------------------|------------------------------------|------------------------------------------------------------------------------------------------------------------------------------------------------------------------------------------------------------------------------------------------------------------------------------------------------------------------------------------------------------------------------------------------------------------------------------------------------------------------------------------------------------------------------------------------------------------------------------------------------------------------------------------------------------------------------------------------------------------------------------------------------------------------------------------------------------------------------------------------------------------------------------------------------------------------------------------------------------------------------------------------------------------------------------------------------------------------------------------------------------------------------------------------------------------------------------------------------------------------------------------------------------------------------------------------------------------------------------------------------------------------------------------------------------------------------------------------------------------------------------------------------------------------------------------------------------------------------------------------------------------------------------------------------------------------------------------------------------------------------------------------------------------------------------------------------------------------------------------------------------------------------------------|
| Problem identification and procurement | 1. Identify and prioritize a problem        | Fitness for purpose                | <ul style="list-style-type: none"> <li>a. Ensure that problems are prioritized and funded equally across all patient subgroups.</li> <li>b. Determine whether there are patient populations for whom a solution to the prioritized problem should not be used, should be used differently, or whose experience with the system should be closely monitored.</li> </ul>                                                                                                                                                                                                                                                                                                                                                                                                                                                                                                                                                                                                                                                                                                                                                                                                                                                                                                                                                                                                                                                                                                                                                                                                                                                                                                                                                                                                                                                                                                                   |
|                                        | 2. Define AI product scope and intended use | Reliability and validity, Fairness | <ul style="list-style-type: none"> <li>a. List alternative solutions for the problem, including non-technical interventions and other non-AI technical interventions.</li> <li>b. Define an ideal label for model development.</li> <li>c. Seek an approval from an institutional review board, ethical review board, or research ethics board to access and use local healthcare retrospective data.</li> <li>d. Assess health inequities present in the local healthcare retrospective data and identify disadvantaged patient subgroups within the context of the prioritized problem.</li> <li>e. Examine whether a local healthcare retrospective data set is representative of demographic representation of local non-healthcare data.</li> <li>f. Assess health inequities present in the model training data and identify disadvantaged patient subgroups within the context of the prioritized problem.</li> <li>g. Examine whether the model training data is representative of the demographics present within the local healthcare retrospective data.</li> <li>h. Analyze label choice bias across disadvantaged and advantaged patient subgroups.</li> <li>i. Ensure that the model features are relevant to its actual label and capture the same meanings across disadvantaged and advantaged patient subgroups.</li> <li>j. Identify potential hidden stratification that masks unequal model performance between disadvantaged and advantaged patient subgroups.</li> <li>k. Gather model performance data and compare it between disadvantaged and advantaged patient subgroups.</li> <li>l. Determine which SDOH and demographic data are appropriate to be included in the model to minimize potential risk of worsening health inequities.</li> <li>m. Determine which potential solution best solves the problem for disadvantaged patient subgroups.</li> </ul> |
| Development and adaptation             | 3. Develop success                          | Fairness                           | <ul style="list-style-type: none"> <li>a. Establish equity objectives for implementation of the selected AI solution.</li> </ul>                                                                                                                                                                                                                                                                                                                                                                                                                                                                                                                                                                                                                                                                                                                                                                                                                                                                                                                                                                                                                                                                                                                                                                                                                                                                                                                                                                                                                                                                                                                                                                                                                                                                                                                                                         |

|                      |                                                        |                                                    |                                                                                                                                                                                                                                                                                                                                                                                                                                                                                                                                                                                                                                                                                                                                                                                                                                                                                                                                                                                                                                                                                                                                                                                                                                                                                                                                                                                                                                                                                                                                                                                                                                                                                                                                  |
|----------------------|--------------------------------------------------------|----------------------------------------------------|----------------------------------------------------------------------------------------------------------------------------------------------------------------------------------------------------------------------------------------------------------------------------------------------------------------------------------------------------------------------------------------------------------------------------------------------------------------------------------------------------------------------------------------------------------------------------------------------------------------------------------------------------------------------------------------------------------------------------------------------------------------------------------------------------------------------------------------------------------------------------------------------------------------------------------------------------------------------------------------------------------------------------------------------------------------------------------------------------------------------------------------------------------------------------------------------------------------------------------------------------------------------------------------------------------------------------------------------------------------------------------------------------------------------------------------------------------------------------------------------------------------------------------------------------------------------------------------------------------------------------------------------------------------------------------------------------------------------------------|
|                      | measures                                               |                                                    | b. Identify the most appropriate fairness metrics to use for the selected AI product and its design.                                                                                                                                                                                                                                                                                                                                                                                                                                                                                                                                                                                                                                                                                                                                                                                                                                                                                                                                                                                                                                                                                                                                                                                                                                                                                                                                                                                                                                                                                                                                                                                                                             |
|                      | 4.<br>Design AI solution workflow                      | Fairness, Fitness for purpose, Transparency        | <ul style="list-style-type: none"> <li>a. Ensure that the solution design is informed by meaningful and pragmatic recommendations from members of disadvantaged patient subgroups.</li> <li>b. Ensure that the solution design promotes inclusivity of clinical end-users and usability of the solution.</li> <li>c. Design complementary non-technical solution components required to achieve equity objectives for implementation of the solution.</li> <li>d. Align clinical end-users and organizational leaders to achieve equity objectives.</li> </ul>                                                                                                                                                                                                                                                                                                                                                                                                                                                                                                                                                                                                                                                                                                                                                                                                                                                                                                                                                                                                                                                                                                                                                                   |
|                      | 5.<br>Generate evidence of safety, efficacy and equity | Accountability, Fairness, Reliability and validity | <ul style="list-style-type: none"> <li>a. Assess completeness and quality of local data required to construct model features across disadvantaged patient subgroups.</li> <li>b. Seek an approval from an institutional review board, ethical review board, or research ethics board to access and use local healthcare prospective data.</li> <li>c. Analyze label choice bias across disadvantaged and advantaged patient subgroups.</li> <li>d. Ensure that the model features are relevant to its actual label and capture the same meanings across disadvantaged and advantaged patient subgroups.</li> <li>e. Identify potential hidden stratification that masks unequal model performance between disadvantaged and advantaged patient subgroups.</li> <li>f. Assess model performance and compare it between disadvantaged and advantaged patient subgroups.</li> <li>g. Determine which SDOH and demographic data are appropriate to be included in the model to minimize potential risk of worsening health inequities.</li> <li>h. Assess prospective model performance and compare it to retrospective model performance across disadvantaged and advantaged patient subgroups.</li> <li>i. Perform comprehensive assessment of model performance across disadvantaged and advantaged patient subgroups.</li> <li>j. If the model performs worse for a certain patient subgroup on local prospective healthcare data, consider adapting the model or its use to help minimize negative impacts on inequities.</li> <li>k. Ensure that model performance aligns with the equity objectives.</li> <li>l. Conduct a prospective pilot study to validate whether the AI solution achieves equity objectives.</li> </ul> |
| Clinical integration | 6.<br>Execute AI                                       | Accountability, Fairness,                          | a. Document information about the model development and implementation and share it with clinical end-users, members of                                                                                                                                                                                                                                                                                                                                                                                                                                                                                                                                                                                                                                                                                                                                                                                                                                                                                                                                                                                                                                                                                                                                                                                                                                                                                                                                                                                                                                                                                                                                                                                                          |

|                      |                                           |                                                                  |                                                                                                                                                                                                                                                                                                                                                                                                                                                                                                                                                                                               |
|----------------------|-------------------------------------------|------------------------------------------------------------------|-----------------------------------------------------------------------------------------------------------------------------------------------------------------------------------------------------------------------------------------------------------------------------------------------------------------------------------------------------------------------------------------------------------------------------------------------------------------------------------------------------------------------------------------------------------------------------------------------|
|                      | solution rollout                          | Transparency                                                     | <p>disadvantaged patient subgroups, and others who may be affected by use of the model.</p> <ul style="list-style-type: none"> <li>b. Educate clinical end-users about potential bias in using the solution.</li> <li>c. Where applicable, seek an approval from an institutional review board, ethical review board, or research ethics board to implement and use the AI solution in clinical practice.</li> <li>d. After rollout, continue to seek feedback from clinical end-users and members of disadvantaged and advantaged patient subgroups to achieve equity objectives.</li> </ul> |
| Lifecycle management | 7. Monitor the AI solution                | Fairness, Reliability and validity, Transparency                 | <ul style="list-style-type: none"> <li>a. Regularly monitor the model performance across disadvantaged and advantaged patient subgroups.</li> <li>b. Regularly monitor the work environment of the solution across disadvantaged and advantaged patient subgroups.</li> <li>c. Regularly monitor health inequities across disadvantaged and advantaged patient subgroups.</li> </ul>                                                                                                                                                                                                          |
|                      | 8. Update or decommission the AI solution | Accountability, Fairness, Reliability and validity, Transparency | <ul style="list-style-type: none"> <li>a. Determine updates to the model or its work environment.</li> <li>b. If updating the model or its work environment does not improve model performance or fails to improve progress towards equity objectives, consider decommissioning the model.</li> <li>c. If the model successfully achieved equity objectives and there is interest to expand model use, evaluate appropriate technical and non-technical resources to expand the AI solution to new settings.</li> </ul>                                                                       |
